# Supplementary material for: A non-canonical Aux/IAA gene MsIAA32 regulates peltate glandular trichome development in spearmint
Source: Front Plant Sci. 2024 Feb 5;15:1284125. doi: 10.3389/fpls.2024.1284125 (PMC10875047; doi:10.3389/fpls.2024.1284125)
Supplement: Supplementary file 2 [file Table_1.xlsx]

## Sheet: Table S1
Table S1. List of primers used in this study
Name	Sequence (5’ to 3’)	Purpose
SphI_RNAi_IAA_F	CGTAGCATGCGCATCAAGCTACCTCTTAA	RNAi
HindIII_RNAi_IAA_R	ATCAAGCTT TCCATGTTAACCTTCACATAG	RNAi
NdeI_RNAi_IAA_F	ATCCATATG GCATCAAGCTACCTCTTAA	RNAi
XhoI_RNAi_IAA_R	CGTACTCGAG TCCATGTTAACCTTCACATAG	RNAi
NL_MsIAA32_F	CACCATGGATTCCAATGCATCAAGCTACC	Subcellular localization
NL_MsIAA32_R	AGTCAGATTTTCATCCTTGCATGCAATTCTCAG	Subcellular localization
GW_MsIAA32_GSP1	TTCAGCTGCGGGTGCAGCTGCTGCCAG	Genome walking
GW_MsIAA32_GSP2	GGAGGGTAGCAAGTGGTAGGCTGAACAATGCGC	Genome walking
P_IAA32_F	CACTTAATCTTAGCCTATAGGCCG	Promoter expression
P_IAA32_R	GGATAGATAATACACAAAGATGAATG	Promoter expression
q_MsIAA32_F	GTTTGCCTCCTCGAGCAAATGGAC	qPCR
q_MsIAA32_R	TCATCCTTGCATGCAATTCTCAGCC	qPCR
GAPDH_F	GGAAGCACCACGAGCTCAAGGTTAA	qPCR
GAPDH_R	CAGATGGGCAGCAGCCTTATCCTT	qPCR
Ara_Tublin_F	TCAAGAGGTTCTCAGCAGTA	qPCR
Ara_Tublin_R	TCACCTTCTTCATCCGCAGTT	qPCR
q_GPS_SSU_F	TGGCAGTGGCCTCAGCAGTTCATC	qPCR
q_GPS_SSU_R	TTGGGCGACGGTGGCGATAGT	qPCR
q_GPS_LSU_F	GCAGGCCGACGAACCACAAGGT	qPCR
q_GPS_LSU_R	CGAGCAGATGTCCACCACCTGCC	qPCR
q_IAA3_F	GCCGGTGAGGTCTTACCGGAGGA	qPCR
q_IAA3_R	ACCCTTTGTATCCTTCTCTCTCAGAGTAGTCA	qPCR
q_IAA4_F	AGAGAGCCTCGCCGGAGACG	qPCR
q_IAA4_R	GGAGCTCCATCCACGCTCACTTT	qPCR
CMK_F	ATTAGCAGAGCGCGTGATGA	qPCR
CMK_R	CATAGCCGCAGCAGGTAGAG	qPCR
DXS_F	TGCCATCGATCCATTCTGAGG	qPCR
DXS_R	GGCTTCTCTCCGGTGAAACT	qPCR
HDR_F	TACCAGAGGGTCCCATCACC	qPCR
HDR_R	CGAGATACGCTACCCTTGCTT	qPCR
HDS_F	AGCACGCCTCTGTAGTCAAC	qPCR
HDS_R	GAACCCCCAGAGGAGGAGAT	qPCR
MCS_F	CATGCATAAGCCGAACAGCC	qPCR
MCS_R	TCACTCCGACGGGGATGTAT	qPCR
DXR_F	TGGACGAGGAGGCATACTGA	qPCR
DXR_R	ACGGTATTGGTACGGCGAAA	qPCR
CMS_F	ACGTTGGCCAAGAAGTGGAA	qPCR
CMS_R	GAATTCCGCCCCTCATTTGC	qPCR
qMsLS-F	GTCTCGCCTCCGTGTGTATT	qPCR
qMsLS-R	GCCCTAATCGCGTGTTTGTC	qPCR
ARF3_F	CACCATGGCGAACAGAGTGT	Cloning
ARF3_R	TTAATCACCAAGATGTTGCAAGCTG	Cloning
IAA4_F	CACCATGGAGAGAATCATGGCCA	Cloning
IAA4_R	CTACTGAGCAAAACCCAATCCTCTG	Cloning
IAA3_F	CACCATGGAGTGTTGCGATCTGA	Cloning
IAA3_R	TCATACAGAGCAACCTAATCCT	Cloning
q_MYB36_F	CTCAGATGGCTCAACTACCTCAGACCA	qPCR
q_MYB36_R	AATCGTACGGCGAGGGGATTCG	qPCR
q_Cyclin_F	GGTTGTCAAGGAGAAGCAGGAAGTGAAG	qPCR
q_Cyclin_R	CTGCAAGAGGATTCTTCTTATCGGAGGC	qPCR
q_Ara_cyclin B2-4_F1	AGCTGTGTCCCGCCTAACTACATGGAG	qPCR
q_Ara_cyclin B2-4_R1	GCAAGCAAGTAACATAGCTGTTACACCCA	qPCR

## Sheet: Table S2
Table S2. Sequence data and expression values of spearmint Aux/IAAs
Transcript ID	Gene name	Expression values (FPKM)				Sequence
		L	L-T	R	T
comp29342_c0	MsIAA32	2.67582	0	0	7.40097	ATGGATTCCAATGCATCAAGCTACCTCTTAAATCATGCAGCTCTCTCTTCCTATCTTGGGAAAGAGGATTCTAATATTATCGATTTGGGATTGAGTCTGCGCATTGTTCAGCCTACCACTTGCTACCCTCCTAGCCATGAAAACTACGACGTGCTAGTGGACTGGCAGCAGCTGCACCCGCAGCTGAAGAAGAGCCATGAGTCGAATGCGACGAAGGAAAACTGCGACGAAGAATCGGAGGGGATACAGAGCAAGCAACGGTGGAGCTATGTGAAGGTTAACATGGATGGGGTGGTGGTGGGGAGGAAAGTTTGCCTCCTCGAGCAAATGGACTATTTTACCCTTGCCTTCCAACTTGAGGAAATGTTTGGGAAATTATCAGTGTCTGGATTGAGGCTT…
comp27193_c0	MsIAA28	2.34199	1.1635	0.201634	0.765535	GGAAGATCGATTTGAGCGTGCTTCGCTCCCATCGCACGCTTGCTTCCAAACTCATTTCCTTGTTTGGAAAATGTGATGATGAGGAGTACAAACTCATGTATGAGAACAAGGAAGGTGAATGGCTTCAAGCAAGGGATGCAACTTGGGAATGCTTCATCAAGTCGGTTCGACGGTTGAAGTTGGAGAGAAGAATGGGTATTGATTAATTTTGAGAAATGTTCGACTTAATAGCTAGAGTACCATTGCATATATATTTTCTTTTTCTATTTTTAGTTTAAATG
comp27468_c2	MsIAA1	4.67073	4.81711	5.99141	4.0917	GAAGGTGAGCATGGACGGAGCTCCATATCTGAGGAAGATTGATCTCAAGCTGTACAAGACCTACTCTGATCTCCTCAAGGCCTTGGAGGCCATGTTCAACTGCACCATAGGTGTGTACTCAGAGAGAGAAGGGTACAATGGTTCTGAGTTGGCGCCAACTTATGAAGACAAAGATGGAGATTGGATGCTTGTTGGAGATGTTCCA
comp40662_c0	MsIAA9	6.99684	5.25134	9.10991	4.37016	ATGGCTTCATCATCAGACTGTATTTCCCAGATTGGCTCGGGTTTGAAAGAACGCAATTACTTTGGGTTCTCGGATTGTTCCTCCGTGGACAGCTCGGCTGTCTCTAGTGTGCCGGAGGAAAGCAAGGCTAATCTGAACCTGAAGGCCACTGAATTAAGGCTTGGCCTTCCTGGATCTCAATCCCCCGAGAGAGATTCCGACTTTGCACTATTAAATGCCGTTAAGCTTGATGAGAAGCATCTGTTCCCCTTGGTTCCTTCCAAGGATGGAATCTGCACTCTTTCAGCAAAGACTGTAATGGCAACCGGAAACAAGAGAGGTTTTCAAGACACGGTTGATGGGTTTTCGGAATCCAAAAGTACTGTTTTTACTGAAGGGAACTGGATGTTTAATGCTACT…
comp28980_c0	MsIAA33	3.88655	2.63923	0	1.67807	ATGAACAGTTTTGATCCCCAAAGGCAAGAATCGGTGAAGAGGATGTGGAGAGCAACGGCGAAGACTGCAGGCATGGAGGAAAGGCTGAAGCATTACAATTACAAGCTGAAAGGTCCCTCAAACCCTAGAATCGGCTTCTCCGACGACGACGTGCTGGTGGCGTCGGTGGTGCCGCCGGTGACGGTGGTTCTGGAGGGGAGATCCATCTGCCAGCGCATCAGCCTCCACAAACACACCAGCTACCACACCCTCGCCATCGCCCTCAGGCACATGTTCGTCGACCTCGATCAATACTCCGACGCCGGCGGCCCAGATCAACCCAATCTCGACCTCTCCAACGCCGTCCCCGGCCACCTCGTTGCCTATGAAGACATGGAAAACGACCTCCTTTTAGTCGGC…
comp27193_c1	MsIAA29	3.20006	2.48285	1.24489	1.20163	ATCGAGTGAGGTTTTGTTCCTTCTTTCTCCTGTTTCTTATTGTTGCAATTCATACATGGAGCTCCGACTGGATCTCGCACTCTCAACCGGATCCGACCCGGTTCCACACCCCAAAACACGCAATTCCGACGAAATGAGCTTCCCATTGCAACACCAAACACAGGAATCGCCCTTTTCCAATAGAATTAGAGATGGTGAAGCGAAGGACGGAGTCGTGGTTGGATGGCCGCCGGTGAGGTCTTGGAGGAAGCAGCTGTGCCGCCACAACCGCCGCGCCTGCGCCGCGAATTACGTTAACGTCGAGAACAGCGGCAGCGGCGGCGGTGGTTGGAGGGGGCAGAATTCTGCGTACGTGAAAGTGAAAATGGAAGGAGTTGGGATTACGAGGAAGATTGATTT…
comp35349_c0	MsIAA16	5.86196	6.05853	6.29204	4.4822	ATGGTCGACGCTATGCCGATGAATTTCGACGGCGGCAAGAAGCTGCTGGACTTTGAGGAGACTGAGCTGCGCCTCGGACTGCCCGGCGCCGGAGATAAGAAACGAGGGTTTGAGGAAATTGTGGATTTGAAGCTCAATCTCTCGTCCAAGGATTCGGCTTCTGATCAGACTGGTTTTGAGGGGAACAATTTGAACGACGCTGCTAAGACTGATTCTGTTAAGCCTCCTGCCAAGGCACAGGTGGTTGGTTGGCCGCCGGTCCGGTCCTTCCGGAAAAACGTGATGGCGGTTCAGAAGAGGAGCGAGCCGGAGGAAACTGAGAAGGGAAGCGGCAGCGGCGGCGCCGCCTTGGTGAAGGTGAGCCTGGACGGCGCTCCCTACCTCAGGAAAGTCGACCTG…
comp36682_c0	MsIAA-4	7.44419	7.54411	8.70294	5.58045	ATGTCTGCATCACTGCTCGGTGTTGGTGGGGACGAGTACCAGAGCAACATTACTCTGCTGGCTTCTTCATCCTCCTTAGAAAGTGTGTGCCAAAATGGATCACAACTCAAGGAACGTAACTACATGGGCCTATCCGACTCGTCATCAGTTGATAGCTCCACAATCTCAGAATACAGTGGCAGTGGTCTCAACTTAAAGGCTACAGAACTAAGGCTTGCTCCCCCAGGATTCCTGTCTCTCGAGAGTTCTTCCACAATCGATGAGAAGCTGCTATTTCCTCTACACCCCTTAAAGGCACTGGTTACCGGCAACAAAAGAGGATTTTCTGATGCTATGAATGGAACCTCAGAGGGGAAACACATTTCTGCTTCGGAAATTGATGCAGTGCTCTCTCCTAAG…
comp30784_c0	MsIAA14	5.59006	7.2695	2.24489	5.1811	ATGTCAACGGAAATAGGAAGCGTTTTGTCGGAAATGGATTTTTCCGGCTGCCTGAAGACAGATCTTACGCTGGGCTTACCCGGCGGCGGCGGCGCGGCGGAGCCGCCGTCGAAGTCCGGCTCCAAGCGCGGATTTTCCGAGATTGTGGACTTGAAACTTGGTGCGAATTGCGATAGCGATGAAGTTAGTGTCTCAACGCCGCCTCCGCCAAAGGCGCAAGTAGTGGGGTGGCCGCCGTTGAGGCCGTCGAGAAAAAAAATGATGAAAAACTTCAAGTACGTGAAAGTAGCCGTGGATGGAGCTCCATATTTGAGGAAAGTGGATCTTGAAATTTACTCTAGTTATCAACAGCTCTTGGCTGCATTGGAGGAAATGTTTACATGTTTAACCATATGTAAT…
comp25871_c0	MsIAA	6.10119	5.23917	0.389567	3.11437	ATGGAGAAAAACGGCGGACTCGAGACGGAGCTGAGGCTGGGCCTCCCCGGCGGCGGTGGTGAGGTGGAGAAGATTAATGAGAAGAAGAGGGTTTTTGATGAGTGTCGTGGGGGTGAGGAGAAGGCGGCGGTGCATAAGAGTCAGGTGGTGGGGTGGCCGCCGGTGGCGGCGTTCCGGCGGAAGAACGGCTTCAACGGCGGGGGGAAAATGTACGTGAAGGTTAGCATGGATGGGGCCCCTTTTCTAAGGAAGGTTGATCTCAACATGCAGAAAGGGTATTCTGAACTTGCTAGGGCTCTTGAAGATTTGTTTGGCTGTTTTGGAATGGTGGAAGCATTGAAGGAGGGTGAAGAAAATTGTGAACTTGTTCCTATCTATGAAGACAAAGATGGGGACTGG…
comp20907_c0	MsIAA17	1.68706	2.47249	2.42492	0	GCCGCCGCCGCCGCCAAAGACTCGCGCCAAGCGAGGATTCGAGGATTTGAGCCCGGAAAACAGCTGTGAAGACGAATCTAGCGTCGTTACGCAATCTTCCCCGCCGGAGAATCAGGTAGTGGGATGGCCACCAGTGAGATCATACAGAAAGAAGATGATAAAAGGAAGCAAATTTGTGAAGGTGGCTGTGGATGGAGCTCCATATCTCAGAAAAATTGATCTTGAAATTTACAATGGCTATCAAGAACTATTGGCTGCATTTGAGGATATGTTTACATGCTTGACCATATGTGATGTTGTGAATGAGAGGAAGATCATGGACTCTGCAAATGGCACAGAATATGTGCCTACTTATGAGGA
comp43172_c1	MsIAA4-1	5.51791	5.11478	6.66803	2.45418	ATGGAGAGAATCATGGCCAATGACCTGAATCTGAAGGCGACTGAGCTCAGGCTGGGCCTACCGGGCTCCGACCAATGCGACGACGTGGTTTCCTCCGCCAAGAATAACAAGAGAGCCTCGCCGGAGACGGCGGAGGACAGCGCCTCGAACGGCGTCCCCGCCGCCAAGTCCGCCGCCGACCGTGAAACTGCACCGGCGCCCAAAGCGCAGATAGTGGGGTGGCCACCGGTGAAGTCTTACCGGAAAAACAACGCGGCGGCGGCGAAGAAGGCGGAGGCGGAATCTGGGATGTTTGTGAAAGTGAGCGTGGATGGAGCTCCTTATCTAAGAAAGATTGATATCAAGCTTTATAAGGGTTACTCTGAGCTGCTTGATGCTTTGGAAGAAATGTTCAAGCTC…
comp32204_c0	MsIAA-2	3.22342	3.40599	1.57531	0	ATGGAGAAAAATGGTTTAGGGCTCGAGACGGAGCTGAGGCTAGGGCTGCCGGGGGCCGGGGAGAGGAAGAGGATGTTTTCTGACGTGTCGGGACAGGTGGCGAACAAGGCGGCGGTGGTGGGGTGGCCGCCGGTGAGGAAGAGTAGGTACGGCGGCGGTGGGATGAAAATGTACGTGAAAGTGAGTGTGGATGGAGCGCCGTTTCTGAGGAAGATTGATTTGAGTAATCATAAGTGCTATTCTGATCTTGTTATGGCTCTTGAGCAACTCTTTGGCTGCTTTGGCCTTGGAGAGGTATTGAAAGATGCAGAAAAATGTGAGTACGTTCCAATTTATGAAGACAAAGATGGAGACTGGATGCTTCTTGGAGATGTCCCTTGGGAGATGTTTGCAGAGTCA…
comp33235_c1	MsIAA14-1	6.81173	7.37287	7.99469	3.90881	ATGGAAGTCGGCCTGAATCTCAAGGCGACCGAGCTCTGCCTCGGCCTTCCCGGCGGCGGCGGCGGAGAAACTGAAGCCGTTAAGATCAACGGAAAGCGAGGGTTTTCCGAAACGATCGATCTGAAGCTCAACCTTCAGTCGAATGAATCTGCTGCTTCAGATCTGAAGGAAAACATGCAGAATCCTTCGAAGGAGAAAGCTATGCTTCCTCCCAAGGATCCAATCAAGCCTCCTGCTAAGGCACAAGTGGTGGGGTGGCCGCCGGTGCGGGCGTTCCGGAAGAACATCATGACTCACCAGAAGAGCGGCGACGGCGGCGACGAGTCGGAGAAGGCGGCATGCAGCGGCGGCGCCGCCTTCGTGAAGGTGTCGATGGACGGCGCTCCCTACCTCCGTAAA…
comp34058_c1	MsIAA-3	3.26303	7.71631	3.64961	6.25304	AGAAGAAGAAGAAGAAGAAGAAACCCCCTTTTCATGGGGCTAGGGTTCTTCATGCAAGAATTCGGACAAGCATCAACGGTTTTTTGACAACGTGTGTACAGTTGTTAGACGAGTTTGGATTTTTTTTTTTTTCATGAAAAAAAAGCTCAGGAAATTTGTAATGTATTTACAAGTGTAGATTTAATTTAGTGCCATACTATACAATATAGAAGCAGATCGAAATTTAATTCTGACTCTCTTGATCTGGTGTTATTGAATTTTAATTTCCCCAGCTTTAATTTTACACATATCACAAAAATAAA
comp18818_c0	MsIAA20	0.111031	0	0	2.49057	GCCGCCGGTGAAGTCCTCGATGAGGAAGATGGCCGAGCAGCACCGCCGCGAAAGCACCGCCGCCAACTACATCACGGTGGAGAACGGCGGCGGCGGCGGAGGATCCAATTGGATGTACGTGAAAGTTGAAATGGAAGGGATCGGTATAGCGAGGAAGATTGATCTAAGCACTCATCATTCTTATGAAACCCTCACTTCCACCCTTATCGCCATGTTTGGGAAACGTCGCGAGAATGTGAGAATGTACAAGCTGACGTATCAGGATAAGGAAGGCGACTGGCTGCTTGCCGGTGATGTACCTTGGCGAAGATTTGTTGGAAGCGTTCGACGTTTGAAATTGCTGAGGGAAAGGACAGAGTAATCTTGTTCTGGATTTATTTATTTTTTTTAATTTTTTTT…
comp38708_c0	MsIAA27	6.62	6.25475	7.17363	4.18824	ATGTCTATACCTCAAGAGCACGACTACATAGGGCTATCGGAGCCTCTGCCGTCGGAGAAAAGCTCCGACAAAACCGCGCCGCCGCCTTCCTCGAATGCGGAGAAAGGCAACGCTTTCAACAACCTTAAAGAGACGGAGCTCCGGCTGGGGTTGCCGGGGTCGGAGGCGCCGCCGGAGAGGAAGGGCGGAGCTGGGGTTTCGCTTTTCGGGAAGGAATTGAAGGACGAGAGCAAGTGTGGATTCGCTCAGAGGATTTTTGTTTCCGGGGCGAAGAGAGGATTCTCCGACGCCATTAATGGTTCTGGGAAATGGGGCTTGTCCATTAATGGCGGATCTGAGGTGGATTTAGTGAAAAGCGCTACTCCCAACGGTAGCAACTCTTCGAAATCGTGTTTGAAT…
comp27468_c0	MsIAA4	2.23879	3.20163	3.79494	3.52356	GAGATGTTCCATGGGAGATGTTCATCTCTTCTTGCAAGAGGTTGAGGATCATGAAAGGATCCGAAGCTAAAGGCTTAGGTGGATGTCTGTAGCTCTCTCTGTTCCAATATTTGATTTGTAATGAATTTGTTTAGGCACGGCTTTGTACAAATGATAGATGAGAGGAGAGTAGTTCTTTGTTGATGACTTTCTCTTTTTTTGGTTTGGATTTATAGGACTGAAGATCATTAATACTACTATTATGTAAAGTGAGGAATACTAAACACCGATTTAGAGGAAGAATGTTCAGTTTTCTTTTATCAGAATTTTATTCAAGTTTTTATCCAG
comp35916_c0	MsIAA13	4.01881	4.23802	5.38474	4.34483	ATGCAAATTGCACTCCTCGACGGCGGCGGAGGGTCGCTGTCTAGTTTGTCAAAGGCGGAGAACGGCGTCATGATGTCATCGGAGGAGTCTTCTTCGTACCCTGATGATTCCGGCTTGGAATTGGGGCTTGGACTCAGTCTCGGAGGTGGGAAGACGAAAGTCAAGCAGCAGCAGCTGCCGCCCGCGGCGGCGGCCGGCGGGGGTTCTTGGGATCACTATGCGAGAATCTTGACCGCTAAAGACTTTTCCCCGGTGGTTTGCACTAAAGCGCTGTCGTCTTCGTCGTCGTCTTCTTCTAACGTCACTAAAGTGAATACCAGCGGCTCCTCCGGCACCAAGAGAACCGCCGAGTCTCCCTGTTCGCCGCCCGGCCGTTCTGCAATTAGTCAGGTTGTGGGA…
comp31403_c0	MsIAA3	3.85599	7.52066	3.09085	6.30488	ATGAAGAGCTGGGATCAGTTCCTGGGGAACTCAAAATCTTGTTTTGATCACCGACAGCCCAAGCTGCTCTATGATTCTTCGTCTCATTCTCTCTCATCATTTTCTCTCTCTAGAAGTTTTCATACAGAGCAACCTAATCCTCTTGCATCTGCCCCTTTCATGATTCTCAGCCTCTTGCATGATGACTTGAACATTCTGCACATTCATCATGAAGTAAGAATTAGTACACTGTTCAAGATTATTTCACACTTTACTCTGTGTTTGTGTGTGTTTAGAGAGAGAGAGAGAGA
comp31403_c1	MsIAA-1	5.03034	8.28401	4.83238	5.72928	ATGGAGTGTTGCGATCTGAATTTCAAGGCTACTGAGCTCAGATTGGGGCTGCCCGGCTCAGATGCGGTTTCTCCGGCGAAAAAGAGATCTTCGCCGGAGTCGGATGACGCCGCCGGCGTCTCTTCTGATCGTGAATCTGCGCCGCCGCCGCCCAAGGCTCAGATTGTGGGGTGGCCGCCGGTGAGGTCTTACCGGAGGAACAATATTCCGGCGAAGGGCGCGGAGGCGGAGGCCGGGATTTATGTGAAGGTGAGCATGGACGGAGCTCCTTACCTGAGGAAGATTGATTTGAAAGTTTACGGTGGTTATTCGGAGCTTCTTGAAGCTTTGGAAAGCATGTTCAAATTCACCATAGGTCAATACTCTGAGAGAGAAGGATACAAAGGGTCAGAATATGCA…
comp27468_c1	MsIAA3	4.49057	4.56071	5.72329	1.5656	GGGGGAGCATGAATTCAGCTGTCACGAAATTCATGTACACGCAGAATAAGGCCCACAGATACTGTCTCTCTATCTCTCCTTTCTATAAAACTCTCTCTCCATTTTCCCACAACTTGCATTCCTCAATTTCTCCTCCAACAATCTTTAAGTTTCAACAAAGAAAAAAAAAAATAATAATGGAGAGGACTTCTTCTTCTTCAGCAGCAGCAGCAGCAGCAGTTTTTCAGAAGGATGATCTGAATCTGAGATTAGGGCTTCCCGGTAGTGATGAATCGGAGCAGCCATCTTCTTCATCTTTCCTCAACAGCAACAACAAGAGATCTTCATCCAACATGGAGAAGGATCAAGTTCAGCAATCCGCCTCCCCACCTCCTAAGGCACAAGTAGTGGGCTGGCCGC…

## Sheet: Table S3
Table S3. Accession numbers of A. thaliana and Solanum lycopersicum Aux/IAAs
Protein name	NCBI accession numbers
AtIAA1	P49677
AtIAA2	P49678
AtIAA3	Q38822
AtIAA4	P33077
AtIAA5	P33078
AtIAA6	Q38824
AtIAA7	Q38825
AtIAA8	Q38826
AtIAA9	Q38827
AtIAA10	Q38828
AtIAA11	Q38829
AtIAA12	Q38830
AtIAA13	Q38831
AtIAA14	Q38832
AtIAA15	Q9C966
AtIAA16	O24407
AtIAA17	P93830
AtIAA18	O24408
AtIAA19	O24409
AtIAA20	O24410
AtIAA26	Q8LAL2
AtIAA27	Q9ZSY8
AtIAA28	Q9XFM0
AtIAA29	Q93WC4
AtIAA30	Q9M1R4
AtIAA31	Q8H174
AtIAA32	Q8RYC6
AtIAA33	Q9FKM7
AtIAA34	Q9C5X0
SlIAA1	AEX00347
SlIAA2	AEX00348
SlIAA3	AEX00349
SlIAA4	AEX00350
SlIAA7	AEX00351
SlIAA8	AEX00352
SlIAA9	AEX00353
SlIAA11	AEX00354
SlIAA12	AEX00355
SlIAA13	AEX00356
SlIAA14	AEX00357
SlIAA15	AEX00358
SlIAA16	AEX00359
SlIAA17	AEX00360
SlIAA19	AEX00361
SlIAA21	AEX00362
SlIAA22	AEX00363
SlIAA23	AEX00364
SlIAA26	AEX00365
SlIAA27	AEX00366
SlIAA29	AEX00367
SlIAA32	AEX00368
SlIAA33	AEX00369
SlIAA35	AEX00370
SlIAA36	AEX00371

## Sheet: Table S4
Table S4. Accession numbers of A. thaliana and Solanum lycopersicum ARFs
Protein name	TAIR accession numbers
ARF1	AT1G59750
ARF2	AT5G62010
ARF3/ETTIN	AT2G33860
ARF4	AT5G60450
ARF5/MP	AT1G19850
ARF6	AT1G30330
ARF7/NPH4	AT5G20730
ARF8	AT5G37020
ARF9	AT4G23980
ARF10	AT2G28350
ARF11	AT2G46530
ARF12	AT1G34310
ARF13	AT1G34170
ARF14	AT1G35540
ARF15	AT1G35520
ARF16	AT4G30080
ARF17	AT1G77850
ARF18	AT3G61830
ARF19	AT1G19220
ARF20	AT1G35240
ARF21	AT1G34410
ARF22	AT1G34390
ARF23	AT1G43950
Protein name	NCBI accession numbers
SlARF1	AT2G28350
SlARF2	Q2LAJ3.1
SlARF3	ABC69710.1
SlARF4	ABC69715.1
SlARF5	ADJ96592.1
SlARF6	ACU30063.2
SlARF7	XP_004243692.1
SlARF8	ABS83388.1
SlARF9	ADH03013.1
SlARF10	ADK26472.1
SlARF11	XP_004252281.1
SlARF12	ADP06660.1
SlARF13	ADP06661.1
SlARF14	ADP06664.1
SlARF16	ADJ96591.1
SlARF17	ADR66030.1
SlARF18	XP_010327133.1
SlARF19	ADI87602.1
SlARF24	NP_001303697.1

## Sheet: Table S5
Supplemental Table 4. Accession numbers of A. thaliana R2R3-MYBs
Protein name	TAIR accession numbers
AtMYB0	AT3G27920
AtMYB1	AT3G09230
AtMYB2	AT2G47190
AtMYB3	AT1G22640
AtMYB4	AT4G38620
AtMYB5	AT3G13540
AtMYB6	AT4G09460
AtMYB7	AT2G16720
AtMYB8	AT1G35515
AtMYB9	AT5G16770
AtMYB10	AT3G12820
AtMYB11	AT3G62610
AtMYB12	AT2G47460
AtMYB13	AT1G06180
AtMYB14	AT2G31180
AtMYB15	AT3G23250
AtMYB16	AT5G15310
AtMYB17	AT3G61250
AtMYB18	AT4G25560
AtMYB19	AT5G52260
AtMYB20	AT1G66230
AtMYB21	AT3G27810
AtMYB22	AT5G40430
AtMYB23	AT5G40330
AtMYB24	AT5G40350
AtMYB25	AT2G39880
AtMYB26	AT3G13890
AtMYB27	AT3G53200
AtMYB28	AT5G61420
AtMYB29	AT5G07690
AtMYB30	AT3G28910
AtMYB31	AT1G74650
AtMYB32	AT4G34990
AtMYB33	AT5G06100
AtMYB34	AT5G60890
AtMYB35	AT3G28470
AtMYB36	AT5G57620
AtMYB37	AT5G23000
AtMYB38	AT2G36890
AtMYB39	AT4G17785
AtMYB40	AT5G14340
AtMYB41	AT4G28110
AtMYB42	AT4G12350
AtMYB43	AT5G16600
AtMYB44	AT5G67300
AtMYB45	AT3G48920
AtMYB46	AT5G12870
AtMYB47	AT1G18710
AtMYB48	AT3G46130
AtMYB49	AT5G54230
AtMYB50	AT1G57560
AtMYB51	AT1G18570
AtMYB52	AT1G17950
AtMYB53	AT5G65230
AtMYB54	AT1G73410
AtMYB55	AT4G01680
AtMYB56	AT5G17800
AtMYB57	AT3G01530
AtMYB58	AT1G16490
AtMYB59	AT5G59780
AtMYB60	AT1G08810
AtMYB61	AT1G09540
AtMYB62	AT1G68320
AtMYB63	AT1G79180
AtMYB64	AT5G11050
AtMYB65	AT3G11440
AtMYB66	AT5G14750
AtMYB67	AT3G12720
AtMYB68	AT5G65790
AtMYB69	AT4G33450
AtMYB70	AT2G23290
AtMYB71	AT3G24310
AtMYB72	AT1G56160
AtMYB73	AT4G37260
AtMYB74	AT4G05100
AtMYB75	AT1G56650
AtMYB76	AT5G07700
AtMYB77	AT3G50060
AtMYB78	AT5G49620
AtMYB79	AT4G13480
AtMYB80	AT5G56110
AtMYB81	AT2G26960
AtMYB82	AT5G52600
AtMYB83	AT3G08500
AtMYB84	AT3G49690
AtMYB85	AT4G22680
AtMYB86	AT5G26660
AtMYB87	AT4G37780
AtMYB88	AT2G02820
AtMYB89	AT5G39700
AtMYB90	AT1G66390
AtMYB91	AT2G37630
AtMYB92	AT5G10280
AtMYB93	AT1G34670
AtMYB94	AT3G47600
AtMYB95	AT1G74430
AtMYB96	AT5G62470
AtMYB97	AT4G26930
AtMYB98	AT4G18770
AtMYB99	AT5G62320
AtMYB100	AT2G25230
AtMYB101	AT2G32460
AtMYB102	AT4G21440
AtMYB103	AT1G63910
AtMYB104	AT2G26950
AtMYB105	AT1G69560
AtMYB106	AT3G01140
AtMYB107	AT3G02940
AtMYB108	AT3G06490
AtMYB109	AT3G55730
AtMYB110	AT3G29020
AtMYB111	AT5G49330
AtMYB112	AT1G48000
AtMYB113	AT1G66370
AtMYB114	AT1G66380
AtMYB115	AT5G40360
AtMYB116	AT1G25340
AtMYB117	AT1G26780
AtMYB118	AT3G27785
AtMYB119	AT5G58850
AtMYB120	AT5G55020
AtMYB121	AT3G30210
AtMYB122	AT1G74080
AtMYB123	AT5G35550
AtMYB124	AT1G14350
